# Supplementary material
Source: PubMed Central journal article supplement (PMC4273384)
Supplement: pnas.201410162SI.pdf [file pnas.201410162SI.pdf]

# Supporting Information

Palczewska et al. 10.1073/pnas.1410162111

## SI Methods

**Bleaching of Rhodopsin Crystals.** Trigonal crystals of ground-state bovine rhodopsin were grown as previously described (1, 2). A single crystal was transferred to an ~2- $\mu$ L drop of paraffin oil located in a glass-bottomed 35-mm dish (MatTek Corp.). The crystal was placed on the 2PO microscope stage, and about half of it was irradiated with a 1,000-nm laser beam (15 mW, 20- $\mu$ m slices, 20 frames, two line averages, 2.3 ms/line). The crystal then was placed under a bright-field microscope and immediately photographed (to reveal bleaching of the section irradiated with the 1000-nm laser), and then the whole crystal was exposed to intense white light for 2 min (to bleach the entire crystal).

**Bleaching of Rhodopsin.** ROS (2, 3) were solubilized with lauryl maltoside neopentyl glycol/cholesteryl hemisuccinate (LMNG/CHS) to achieve a final concentration of ~100  $\mu$ M rhodopsin in 5 mM LMNG, 0.5 mM CHS, 25 mM Tris/HCl, pH 7.4, 140 mM NaCl, and 3 mM KCl. The sample was centrifuged for 15 min at 15,000  $\times$  *g* to remove unsolubilized material. Next, 3  $\mu$ L of sample were pipetted into a 1.1-mm-diameter capillary tube, and the sample was bleached with the 2PO microscope 1,000-nm, 75-fs laser (40 mW, 20- $\mu$ m slices, 20 frames, two line averages, 2.3 ms/line). After bleaching, the sample was diluted with 1.2 mL of buffer (50 mM Hepes, pH 7.4, containing 0.15 M NaCl, 0.25 mM LMNG, and 25  $\mu$ M CHS) to a final rhodopsin concentration of ~0.2  $\mu$ M, and its absorbance spectrum was measured. Then 11-*cis*-retinal in DMSO stock solution was added to a final concentration of ~0.3  $\mu$ M at room temperature, and the spectrum was measured again. Finally the sample was incubated overnight on ice, and the absorbance spectrum was measured once more. All procedures were carried out under dim red light illumination.

**Bleaching of Green and Blue Cone Opsins.** A human green cone opsin construct with WT-like spectral properties was engineered and expressed in insect sf9 cells in a manner similar to the  $\beta_2$ -adrenergic receptor-T4 lysozyme (T4L) chimera (4). The only purification tag carried by this construct was the C-terminal sequence of bovine rhodopsin (the epitope for the 1D4 antibody) (2). The sf9 cell membranes were washed as previously described

(2), and the green opsin was reconstituted with 9-*cis*-retinal, which induces a blue shift of ~34 nm compared with 11-*cis*-retinal (5, 6). After solubilization of the sf9 membranes with LMNG/CHS 10:1, the green opsin was purified by immunochromatography in a manner similar to rhodopsin (2) and then further purified by gel filtration on a Superdex 200 column (GE Healthcare Life Sciences) in 25 mM *bis*-tris-propane, pH 6.6, 200 mM NaCl, 100  $\mu$ M LMNG, and 10  $\mu$ M CHS. Green opsin was concentrated to ~4.5 mg/mL with a 100-kDa centrifugal concentrator and bleached as described for bovine rhodopsin (2).

In the blue cone opsin construct, T4L replaced intracellular loop-3 residues A232–E236, whereas a PreScission protease site and a deca-histidine tag were placed at the C terminus. The protein was first purified by metal affinity chromatography with TALON resin (Clontech) and next by gel filtration over Superdex 200 in 10 mM sodium phosphate, pH 7.4, 2.7 mM KCl, 0.5 M NaCl, 100  $\mu$ M LMNG, and 10  $\mu$ M CHS. Then, blue opsin was concentrated to 2.9 mg/mL with a 50-kDa centrifugal concentrator and bleached as described for bovine rhodopsin, although an 850-nm laser was used in this case (40 mW, 20- $\mu$ m slices, 20 frames, 2.5 ms/line).

**Bleaching of a Protonated Schiff Base.** Three microliters of 90 mM 11-*cis*-retinal in acetonitrile was mixed with 27  $\mu$ L of 200 mM propylamine [10% (vol/vol) water/acetonitrile, buffered to pH 5.0 with acetic acid] in the dark to form the retinyl-propylamine Schiff base at room temperature. Three microliters of the resulting solution was loaded into a glass capillary tube and bleached by 880-nm light as described for bovine rhodopsin. The retinyl Schiff base sample was recovered with 100  $\mu$ L acetonitrile and then mixed with 300  $\mu$ L hydroxylamine (1 M, pH 7.4) and 300  $\mu$ L methanol. The resulting retinal oximes were extracted with 300  $\mu$ L hexanes, and 100  $\mu$ L of the extract was analyzed by HPLC with a normal phase column (Zobax Sil 5  $\mu$ m, 4.6  $\times$  150 mm; Agilent) and 10% (vol/vol) ethyl acetate/hexanes as the eluting solvent (7). A retinyl-propylamine Schiff base solution kept in the dark for 2 h and another subjected to intense white light for 5 min were used as negative and positive controls, respectively.

1. Salom D, et al. (2006) Improvements in G protein-coupled receptor purification yield light stable rhodopsin crystals. *J Struct Biol* 156(3):497–504.
2. Salom D, Padayatti PS, Palczewski K (2013) Crystallization of G protein-coupled receptors. *Methods Cell Biol* 117:451–468.
3. Papermaster DS (1982) Preparation of retinal rod outer segments. *Methods Enzymol* 81:48–52.
4. Rosenbaum DM, et al. (2007) GPCR engineering yields high-resolution structural insights into beta2-adrenergic receptor function. *Science* 318(5854):1266–1273.

5. Hubbard R, Wald G (1952) Cis-trans isomers of vitamin A and retinene in the rhodopsin system. *J Gen Physiol* 36(2):269–315.
6. Kawamura S, Wakabayashi S, Maeda A, Yoshizawa T (1978) Isorhodopsin: conformation and orientation of its chromophore in frog disk membrane. *Vision Res* 18(4):457–462.
7. Kiser PD, Golczak M, Palczewski K (2013) Chemistry of the retinoid (visual Cycle). *Chem Rev*.

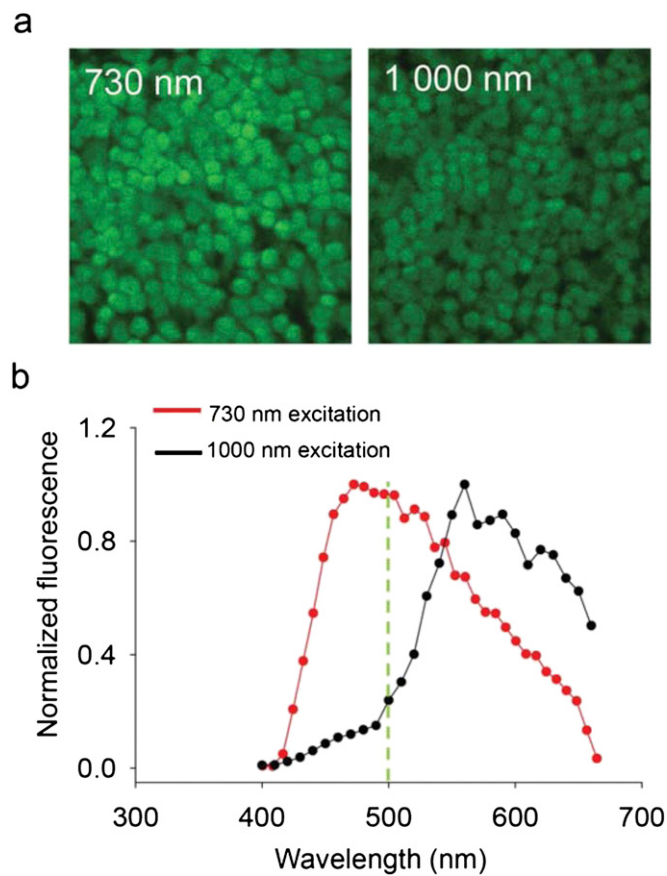

**Fig. S1.** 2PO excited emission spectrum from fresh WT mouse retina. (A) 2PO images of mouse photoreceptors with excitation wavelengths indicated in each image. (B) Emission spectra from photoreceptors: excitation wavelengths were 1,000 (black) and 730 nm (red). Dashed green line indicates the position of the expected SHG signal (not present) after 1,000-nm excitation.

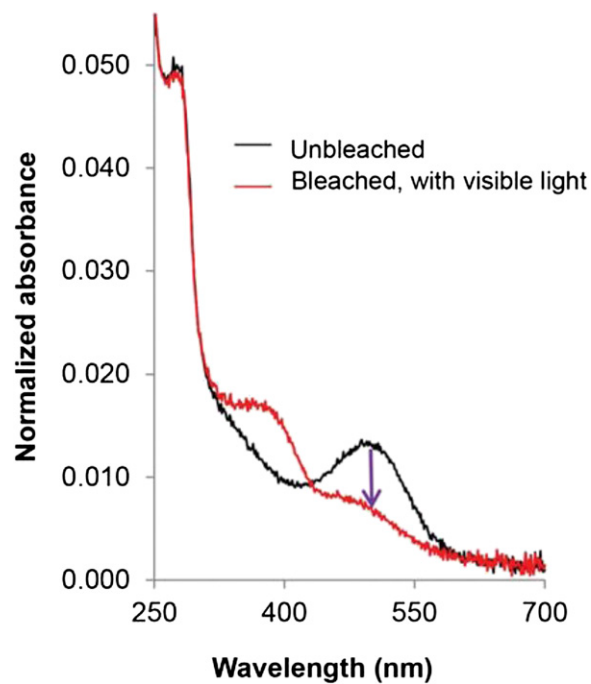

**Fig. S2.** Bleaching of detergent-solubilized bovine rhodopsin with white light. The spectrum of unbleached rhodopsin is shown in black, and the spectrum of rhodopsin after bleaching with white light is shown in red. The indigo arrow indicates the loss in 500-nm absorbance.

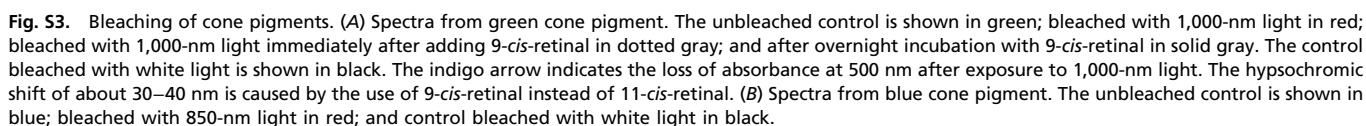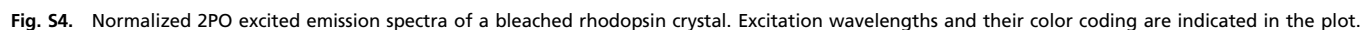

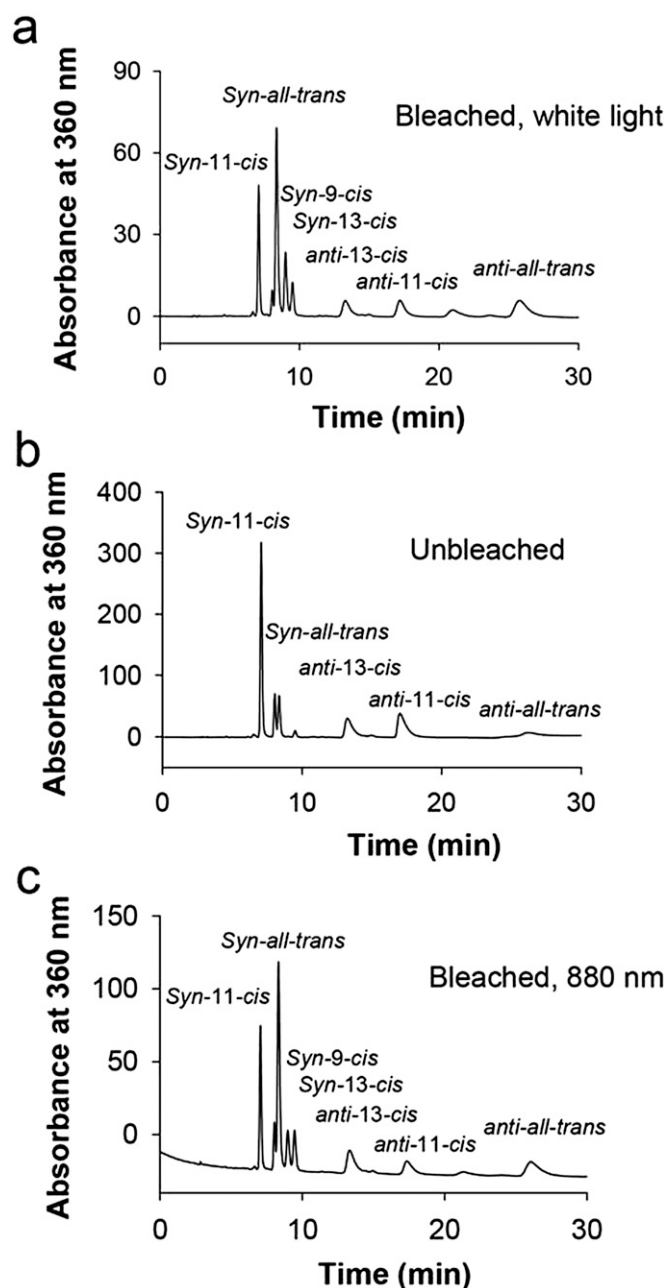

**Fig. S5.** Products of full length 11-*cis*-retinal-propylamine Schiff base photoisomerization. (A) HPLC chromatogram of products after exposure to white light. (B) HPLC chromatogram of unbleached control sample. (C) HPLC chromatogram of products after exposure to 880-nm femtosecond laser light. Indicated isomers in each chromatogram are as follows: 11-*cis*-, 11-*cis*-retinal oxime; 13-*cis*-, 13-*cis*-retinal oxime; 9-*cis*-, 9-*cis*-retinal oxime; all-*trans*-, all-*trans*-retinal oxime. Total amounts of retinoids in each sample were comparable indicating that degradation or loss of retinoids during the experiment were negligible. Additionally, no obvious products of retinoid oxidation were observed. However, spontaneous isomerization of the 11-*cis*-retinylidene Schiff base in the dark was observed even at pH 13, and its isomerization pattern was similar to that of 11-*cis*-retinal incubated with trace amounts of acetic acid (1). This outcome suggests that the Schiff base facilitated the protonation of retinoids, which in turn, catalyzed their isomerization (2).

1. Kiser PD, Golczak M, Palczewski K (2014) Chemistry of the retinoid (visual) cycle. *Chem Rev* 114(1):194–232.

2. Lukton DL, Rando RR (1984) Catalysis of vitamin A aldehyde isomerization by primary and secondary amines. *J Am Chem Soc* 106(16):4525–4531.

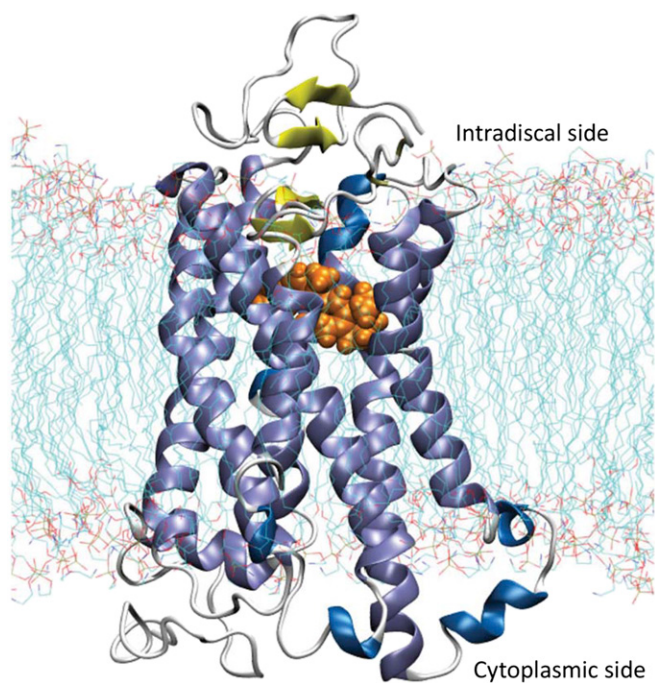

**Fig. S6.** Structural model of rhodopsin used for QM/MM simulations. A cartoon of the protein structure (PDB ID code 1F88) (1) is shown. The chromophore region, treated at the QM level in these calculations, is represented by orange spheres. The embedding POPE bilayer is represented with thin lines. To preserve clarity, solvating water molecules are omitted.

1. Palczewski K, et al. (2000) Crystal structure of rhodopsin: A G protein-coupled receptor. *Science* 289(5480):739–745.
